# Supplementary material for: Recent Findings on Spawning Patterns and Recommendations for the Fishery Management of the Southern Red Snapper—Lutjanus purpureus (Poey, 1866)—On the Amazon Continental Shelf of Brazil
Source: MDPI journal article supplement (doi:10.3390/fishes9040136), 2024-04-15
Supplement: s1 [file s1]

# Recent Findings on Spawning Patterns and Recommendations for the Fishery Management of the Southern Red Snapper—*Lutjanus purpureus* (Poey, 1866)—On the Amazon Continental Shelf of Brazil

**Table S1.** Brazilian regulations governing the *Lutjanus purpureus* fishery in chronological order.

| REGULATION                                                           | SUBJECT OUTLINE                                                                                                                                                                                                                                                                                                                                               |
|----------------------------------------------------------------------|---------------------------------------------------------------------------------------------------------------------------------------------------------------------------------------------------------------------------------------------------------------------------------------------------------------------------------------------------------------|
| Order n. 28, of 27.10.1981(SUDEPE) -<br><b>Revoked</b>               | Suspends the omission of the previous construction permission for vessels designed to catch snapper ( <i>Lutjanus purpureus</i> ), in the federal territory of Amapá until the limit between the states of Alagoas and Sergipe (mouth of the São Francisco river)                                                                                             |
| Order n. 10, of 09.04. 1984(SUDEPE) -<br><b>Revoked</b>              | It defines the minimum catch size for snapper ( <i>Lutjanus purpureus</i> ), in the area from the north of Amapá until the border between the States of Alagoas and Sergipe (mouth of the São Francisco River).                                                                                                                                               |
| Normative instruction n. 04, of 11.03.2004 (MMA) – <b>Revoked</b>    | It limits the fishing fleet that catches snapper ( <i>Lutjanus purpureus</i> ), in the area from the northern limit of Amapá to the border of the states of Alagoas and Sergipe (mouth of the São Francisco River).                                                                                                                                           |
| Normative instruction N° 13, of 13.04.2004 (IBAMA)-                  | Regulates the international marketing of snapper ( <i>Lutjanus purpureus</i> ) individuals with length less than 41 cm for the catches made in accordance with IBAMA Order 172/2002.                                                                                                                                                                          |
| Normative instruction n. 07, of 15.07.2004 (MMA) – <b>Revoked</b>    | Establishes the methods and fishing gear allowed for the capture of snapper ( <i>Lutjanus purpureus</i> ), the minimum catch size and the closed season for the northern limit of Amapá until the border of the states of Alagoas and Sergipe (mouth of the São Francisco River).                                                                             |
| Normative instruction n. 05, of 21.05.2004 (MMA) - <b>Revoked</b>    | Publishes the list of freshwater and saltwater species of invertebrates (80+10), bony fish (141+31) and cartilaginous fish (16+6) aquatic and endangered, overfished or threatened with overexploitation ( <i>L. purpureus</i> considered threatened with overfishing)                                                                                        |
| Normative instruction n. 28, of 09.09.2005 (IBAMA) – <b>Revoked</b>  | Establishes the minimum catch size for snapper ( <i>Lutjanus purpureus</i> ) in the area between the northern boundary of the state of Amapá and the boundary of the states of Alagoas and Sergipe (mouth of the São Francisco River).                                                                                                                        |
| Normative instruction n.80, of 28 December 2005 – <b>Revoked</b>     | Allows, until June 30, 2006, the capture of snapper ( <i>Lutjanus purpureus</i> ).                                                                                                                                                                                                                                                                            |
| Normative instruction n. 168, of 04.09.2007 (IBAMA) – <b>Current</b> | Allow the transformation of the balance of the number of motorized boats in the fleet that operates in the capture of snapper ( <i>Lutjanus purpureus</i> ), as defined in the Normative Instruction MMA n° 004, of March 11, 2004, from boats with total length less than or equal to fifteen meters to boats with total length greater than fifteen meters. |

|                                                                                                                                    |                                                                                                                                                                                                                                                                                                                                                                                                                                                                                                             |
|------------------------------------------------------------------------------------------------------------------------------------|-------------------------------------------------------------------------------------------------------------------------------------------------------------------------------------------------------------------------------------------------------------------------------------------------------------------------------------------------------------------------------------------------------------------------------------------------------------------------------------------------------------|
| Normative instruction n. 22, of 18.10.2007, extended by Normative Instruction n. 26, of 26.11.2007 (SEAP) - <b>Art. 1º current</b> | Convert 20 (twenty) openings originating from the snapper fishing permit ( <i>Lutjanus purpureus</i> ) dealt with in SEAP Normative Instruction 001, of 2005, destined for access for vessels with a total length equal to or less than 15 meters, into 10 (ten) openings for vessels with a total length greater than 15 meters, to operate in the snapper fishery in the area between the northern limit of Amapá, to the border of the States of Alagoas and Sergipe (mouth of the São Francisco River). |
| Interministerial Normative instruction n. 01, of 27.11.2009 (MPA/MMA) - <b>Revoked</b>                                             | It is prohibited the fishing operation of vessels authorized to catch the snapper ( <i>Lutjanus purpureus</i> ), in the area between the northern limit of the State of Amapá until the border of the States of Alagoas and Sergipe (mouth of the São Francisco River), in waters shallower than 50 (fifty) meters deep.                                                                                                                                                                                    |
| Interministerial Normative Instruction n. 08, of 08.06.2012 (MPA/MMA) - <b>Current</b>                                             | It establishes fishing area limitations; - annual fishing ban; monitoring, control, and inspection measures; permitted fishing methods; measures for substituting the authorized vessel; market control measures, for companies that operate in the capture, conservation, processing, industrialization, or commercialization of the species; sanctions and penalties related to the Environmental Crimes Law and its regulation.                                                                          |
| Order nº 73, of 26.03.2018 (MMA) - <b>Current</b>                                                                                  | For the endangered species listed in Appendix I of this Order, sustainable management may be allowed.                                                                                                                                                                                                                                                                                                                                                                                                       |
| Order nº 43, of 31 January 2014 (MMA) - <b>Current</b>                                                                             | Establishes the National Program for the Conservation of Endangered Endangered Species Program - Pró-Espécies, with the objective with the objective of adopting prevention, conservation, management, and management, with a view to minimizing the threats and risk of extinction the risk of extinction of species.                                                                                                                                                                                      |
| Order nº 228, of 14.06.2018 (MMA) - <b>Current</b>                                                                                 | Recognizes the species <i>Lutjanus purpureus</i> (Pargo; Red snapper) as susceptible to exploitation, study or research and establishes the respective conditions.                                                                                                                                                                                                                                                                                                                                          |
| Order nº 42, of 27.07.2018 (SEAP) - <b>Current</b>                                                                                 | Defines rules for the sustainable use and recovery of stocks of the species <i>Lutjanus purpureus</i> (pargo; red snapper).                                                                                                                                                                                                                                                                                                                                                                                 |

## Reference

- BRASIL, PORTARIA SUDEPE Nº 10, DE 09 DE ABRIL DE 1984. Define o tamanho mínimo de captura para pargo (*Lutjanus purpureus*), na área compreendida entre o norte do Amapá até a divisa do Estado de Alagoas e Sergipe (Foz do Rio São Francisco). Disponível em: <http://www.ibama.gov.br/component/legislacao/?view=legislacao&legislacao=91034>
- BRASIL, PORTARIA SUDEPE Nº 28, DE 27 DE ABRIL DE 1981. Suspende a omissão previa da construção para embarcações destinadas a captura do pargo, ), no território federal do Amapá até o limite entre os estados de Alagoas e de Sergipe (Foz do Rio São Francisco). Disponível em: <https://www.icmbio.gov.br/cepsul/legislacao/portaria/253-1981.html>
- BRASIL Secretaria Geral da Presidência da República/Ministro do Meio Ambiente. SPGR/MMA. Portaria Interministerial Nº 42, de 27 de julho de 2018. Define regras para o uso sustentável e a recuperação dos estoques da espécie *Lutjanus purpureus* (pargo). Diário Oficial da União de 30.07.2018. nº 145, Seção 1, p. 5. Disponível em: [https://www.icmbio.gov.br/cepsul/images/stories/legislacao/Portaria/2018/P\\_seap\\_mma\\_42\\_2018\\_regras\\_uso\\_sustentavel\\_pargo.pdf](https://www.icmbio.gov.br/cepsul/images/stories/legislacao/Portaria/2018/P_seap_mma_42_2018_regras_uso_sustentavel_pargo.pdf)
- BRASIL, INSTRUÇÃO NORMATIVA Nº 04 DE 11 DE MARÇO DE 2004. Limita a frota pesqueira que opera na captura de pargo (*Lutjanus purpureus*), na área compreendida entre o limite Norte do Amapá até a divisa dos Estados de Alagoas e Sergipe (Foz do Rio São Francisco). Disponível

- em: [https://www.icmbio.gov.br/cepsul/images/stories/legislacao/Instrucao\\_normativa/2004/in\\_mma\\_04\\_2004\\_limitafrotanacapturadepargo\\_al\\_se\\_altrd\\_in\\_ibama\\_168\\_2007.pdf](https://www.icmbio.gov.br/cepsul/images/stories/legislacao/Instrucao_normativa/2004/in_mma_04_2004_limitafrotanacapturadepargo_al_se_altrd_in_ibama_168_2007.pdf)
5. BRASIL, INSTRUÇÃO NORMATIVA Nº 13 DE 13 DE ABRIL DE 2004. Regulamenta a comercialização internacional de indivíduos de pargo (*Lutjanus purpureus*) com comprimento inferior a 41 cm para as capturas efetuadas conforme Portaria IBAMA nº 172/2002. Regulamenta a comercialização internacional de indivíduos de pargo (*Lutjanus purpureus*) com comprimento inferior a 41 cm para as capturas efetuadas conforme Portaria IBAMA nº 172 de 26 de Setembro 2002. Disponível em: [https://www.icmbio.gov.br/cepsul/images/stories/legislacao/Instrucao\\_normativa/2004/in\\_ibama\\_13\\_2004\\_ordenapescadopargopdf](https://www.icmbio.gov.br/cepsul/images/stories/legislacao/Instrucao_normativa/2004/in_ibama_13_2004_ordenapescadopargopdf)
  6. BRASIL, INSTRUÇÃO NORMATIVA Nº 07 DE 15 DE JULHO DE 2004. Estabelece os métodos e petrechos de pesca permitidos para a captura do pargo (*Lutjanus purpureus*), o tamanho mínimo de captura e o período de defeso para a o limite Norte do Amapá até a divisa dos Estados de Alagoas e Sergipe (foz do Rio São Francisco). Disponível em: [https://www.icmbio.gov.br/cepsul/images/stories/legislacao/Instrucao\\_normativa/2004/in\\_mma\\_07\\_2004\\_regulamentapescadopargo\\_ap\\_al\\_se.pdf](https://www.icmbio.gov.br/cepsul/images/stories/legislacao/Instrucao_normativa/2004/in_mma_07_2004_regulamentapescadopargo_ap_al_se.pdf)
  7. BRASIL, INSTRUÇÃO NORMATIVA Nº 05 DE 21 DE MAIO DE 2004. Publica a lista das espécies de água doce e salgada de invertebrados (80+10), peixes ósseos (141+31) e peixes cartilaginoso (16+6) aquáticos e ameaçados de extinção, sobreexplotados ou ameaçados de sobreexploração. (*L. purpureus* incluso na lista de espécies Ameaçadas de sobrepesca). Disponível em: [https://www.icmbio.gov.br/cepsul/images/stories/legislacao/Instrucao\\_normativa/2004/in\\_mma\\_05\\_2004\\_especiesdeinvertebradosaquaticosepeixesameacadosdeextincaoosobreexplotada\\_altrd\\_in\\_mma\\_52\\_2005.pdf](https://www.icmbio.gov.br/cepsul/images/stories/legislacao/Instrucao_normativa/2004/in_mma_05_2004_especiesdeinvertebradosaquaticosepeixesameacadosdeextincaoosobreexplotada_altrd_in_mma_52_2005.pdf)
  8. BRASIL, INSTRUÇÃO NORMATIVA Nº 28 DE 09 DE SETEMBRO DE 2005. Estabelece o tamanho mínimo de captura do pargo (*Lutjanus purpureus*), na área compreendida entre o limite Norte do Amapá até a divisa dos Estados de Alagoas e Sergipe (Foz do Rio São Francisco). Disponível em: <http://www.ibama.gov.br/sophia/cnia/legislacao/MMA/IN0028-090905.PDF>
  9. BRASIL, INSTRUÇÃO NORMATIVA Nº 80 DE 28 DE DEZEMBRO DE 2005. Permitir, até 30 de junho de 2006, a captura de pargo (*Lutjanus purpureus*). Disponível em: <https://www.ibama.gov.br/component/legislacao/?view=legislacao&legislacao=112291>
  10. BRASIL, INSTRUÇÃO NORMATIVA Nº 168 DE 04 DE SETEMBRO DE 2007. Permitir a transformação do saldo do número de embarcações motorizadas da frota que opera na captura do pargo (*Lutjanus purpureus*), conforme definido na Instrução Normativa MMA nº 004, de 11 de março de 2004, de embarcações com comprimento total menor ou igual a 15 metros. Disponível em: [https://www.icmbio.gov.br/cepsul/images/stories/legislacao/Instrucao\\_normativa/2007/in\\_ibama\\_168\\_2007\\_regulamenta\\_barcos\\_captura\\_pargo\\_naopermissionados.pdf](https://www.icmbio.gov.br/cepsul/images/stories/legislacao/Instrucao_normativa/2007/in_ibama_168_2007_regulamenta_barcos_captura_pargo_naopermissionados.pdf)
  11. BRASIL, INSTRUÇÃO NORMATIVA Nº 22 DE 18 DE OUTUBRO DE 2007. Converter 20 (vinte) vagas originárias do permissionamento da pesca do pargo (*Lutjanus purpureus*) de que trata a Instrução Normativa SEAP nº 001, de 2005, destinadas para acesso das embarcações com comprimento total igual ou inferior a 15 metros, em 10 (dez) vagas para embarcações com comprimento total superior a 15 metros, para operar na pesca do pargo, na área compreendida entre o limite norte do Amapá, até a divisa dos Estados de Alagoas e Sergipe (foz do Rio São Francisco). Disponível em: [https://www.icmbio.gov.br/cepsul/images/stories/legislacao/Instrucao\\_normativa/2007/in\\_seap\\_22\\_2007\\_criterios\\_permissionamento\\_captura\\_pargo\\_ap\\_se\\_altr\\_in\\_1\\_2005\\_altrd\\_in\\_26\\_2007.pdf](https://www.icmbio.gov.br/cepsul/images/stories/legislacao/Instrucao_normativa/2007/in_seap_22_2007_criterios_permissionamento_captura_pargo_ap_se_altr_in_1_2005_altrd_in_26_2007.pdf)
  12. BRASIL, INSTRUÇÃO NORMATIVA INTERMINISTERIAL DE Nº 1 DE 27 DE NOVEMBRO DE 2009. Permiti, na área compreendida entre o limite norte do estado do amapá até a divisa dos estados de alagoas e sergipe (foz do rio são francisco), a captura de pargo (*Lutjanus purpureus*) somente a partir da isóbata de cinquenta metros de profundidade.. Disponível em: [https://www.icmbio.gov.br/cepsul/images/stories/legislacao/Instrucao\\_normativa/2009/in\\_mpa\\_mma\\_02\\_2009\\_defesoanchov\\_a\\_sul\\_revoga\\_p\\_ibama\\_127\\_1994.pdf](https://www.icmbio.gov.br/cepsul/images/stories/legislacao/Instrucao_normativa/2009/in_mpa_mma_02_2009_defesoanchov_a_sul_revoga_p_ibama_127_1994.pdf)
  13. BRASIL, INSTRUÇÃO INTERMINISTERIAL, Nº 08 DE 08 DE JUNHO DE 2012. Fica proibida a operação de pesca das embarcações autorizadas a capturar o pargo (*Lutjanus purpureus*), na área compreendida entre o limite norte do Estado do Amapá até a divisa dos Estados de Alagoas e Sergipe (Foz do Rio São Francisco), em águas mais rasas que 50 (cinquenta) metros de profundidade. Disponível em: [http://propesq-pr.fundepag.br/v2.20.8/arquivos/pagina/1523408976\\_in\\_inter\\_mpa\\_mma\\_08\\_2012\\_defesousopetrechoscapturapargo\\_ap\\_al\\_se\\_nac\\_revog\\_in\\_mpa\\_1\\_2009.pdf](http://propesq-pr.fundepag.br/v2.20.8/arquivos/pagina/1523408976_in_inter_mpa_mma_08_2012_defesousopetrechoscapturapargo_ap_al_se_nac_revog_in_mpa_1_2009.pdf)
  14. BRASIL, PORTARIA Nº 73 DE 26 DE MARÇO DE 2018. Para as espécies ameaçadas constantes no Anexo I desta Portaria, poderá ser permitido o manejo sustentável. Disponível em: <http://www.ibama.gov.br/component/legislacao/?view=legislacao&legislacao=138128>
  15. BRASIL, PORTARIA Nº 43 DE 31 DE JANEIRO DE 2014. Instituir o Programa Nacional de Conservação das Espécies Ameaçadas de Extinção - Pró-Espécies, com o objetivo de adotar ações de prevenção, conservação, manejo e gestão, com vistas a minimizar as ameaças e o risco de extinção de espécies. Disponível em: [https://www.icmbio.gov.br/cepsul/images/stories/legislacao/Portaria/2014/p\\_mma\\_43\\_2014\\_institui\\_programa\\_nacional\\_conserva%C3%A7%C3%A3o\\_esp%C3%A9cies\\_amea%C3%A7adas\\_extin%C3%A7%C3%A3o\\_pro-especies.pdf](https://www.icmbio.gov.br/cepsul/images/stories/legislacao/Portaria/2014/p_mma_43_2014_institui_programa_nacional_conserva%C3%A7%C3%A3o_esp%C3%A9cies_amea%C3%A7adas_extin%C3%A7%C3%A3o_pro-especies.pdf)
  16. BRASIL, PORTARIA Nº 228 DE 14 DE JUNHO DE 2018. Reconhece como passível de exploração, estudo ou pesquisa a espécie *Lutjanus purpureus* (Pargo) e estabelece as respectivas condições. Disponível em:

---

[https://www.icmbio.gov.br/cepsul/images/stories/legislacao/Portaria/2018/P\\_mma\\_\\_228\\_2018\\_exploracao\\_estudo\\_pesquisa\\_pargo.pdf%20PARGO%20JULHO%202017.pdf](https://www.icmbio.gov.br/cepsul/images/stories/legislacao/Portaria/2018/P_mma__228_2018_exploracao_estudo_pesquisa_pargo.pdf%20PARGO%20JULHO%202017.pdf). Acesso no dia: 19/08/2020
